# Supplementary material for: Mixed-metal (Li, Al) amidoborane: synthesis and enhanced hydrogen storage properties
Source: Royal Society of Chemistry journal article supplement (doi:10.1039/c2ta00697a), 2012-11-30
Supplement: c2ta00697a.pdf [file c2ta00697a.pdf]

## **Mixed-metal (Li, Al) amidoborane: synthesis and hydrogen storage properties**

Guanglin Xia,<sup>b,a</sup> Yingbin Tan,<sup>a</sup> Xiaowei Chen,<sup>a</sup> Zaiping Guo,<sup>\*b,c</sup> Huakun Liu,<sup>b</sup> and Xuebin Yu,<sup>\*a</sup>

- a. Department of Materials Science, Fudan University, Shanghai 200433, China*
- b. Institute for Superconducting and Electronic Materials, University of Wollongong, North Wollongong, NSW 2522, Australia*
- c. School of Mechanical, Materials & Mechatronics Engineering, University of Wollongong, NSW 2522, Australia*

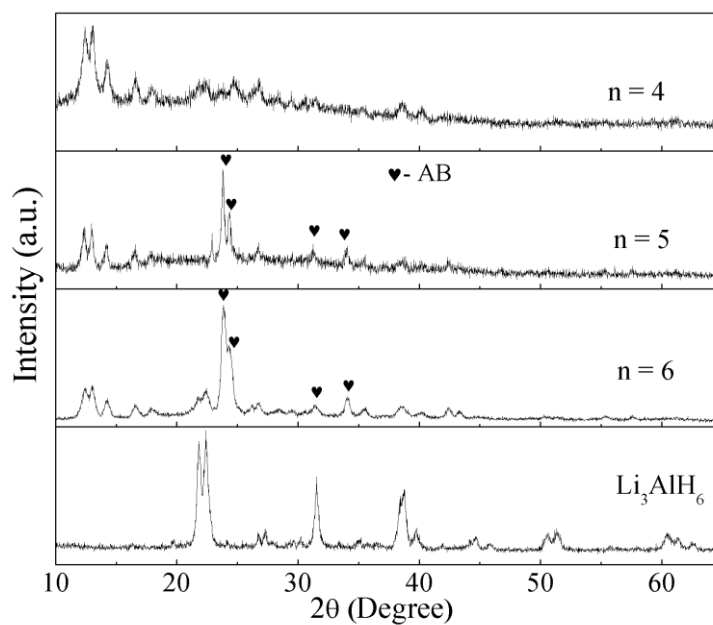

Figure S1. Powder XRD patterns of the as-prepared  $\text{Li}_3\text{AlH}_6 - n \text{ AB}$  ( $n = 4, 5,$  and  $6$ ) composites, with pristine  $\text{Li}_3\text{AlH}_6$  included for comparison.

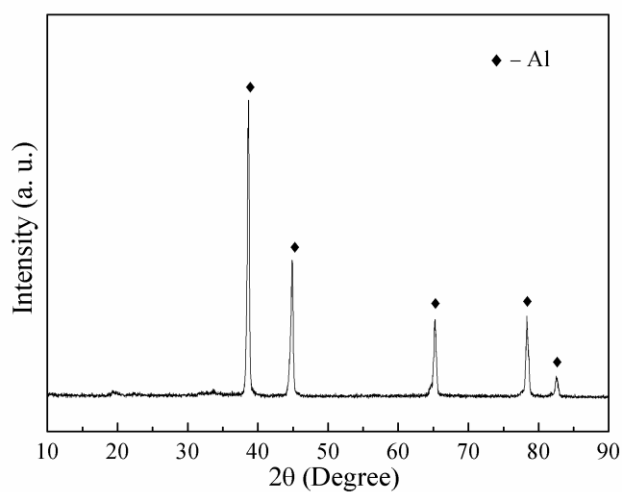

Figure S2. Powder XRD pattern for a hand-milled mixture of  $\text{LiAlH}_4$  and AB in a molar ratio of 1:4.

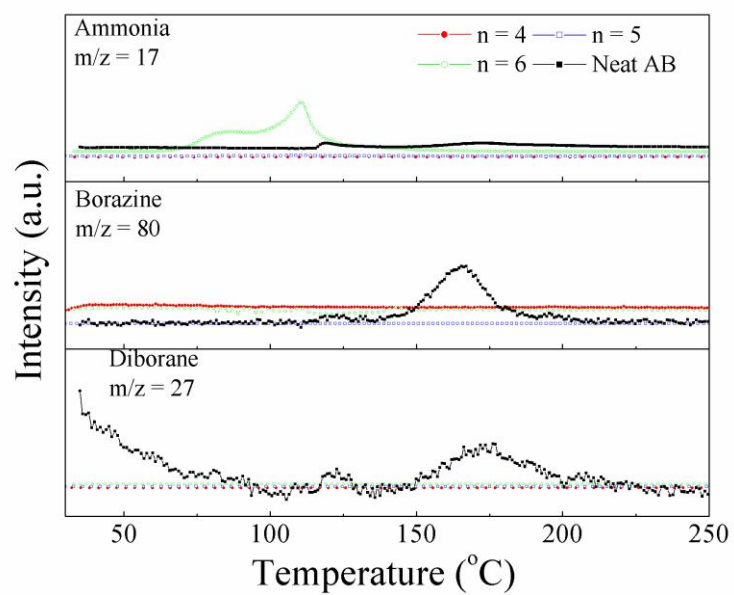

Figure S3. MS spectra for the by-products from the post-milled  $\text{Li}_3\text{AlH}_6 - n \text{ AB}$  ( $n = 4, 5,$  and  $6$ ) composites, including neat AB for comparison.

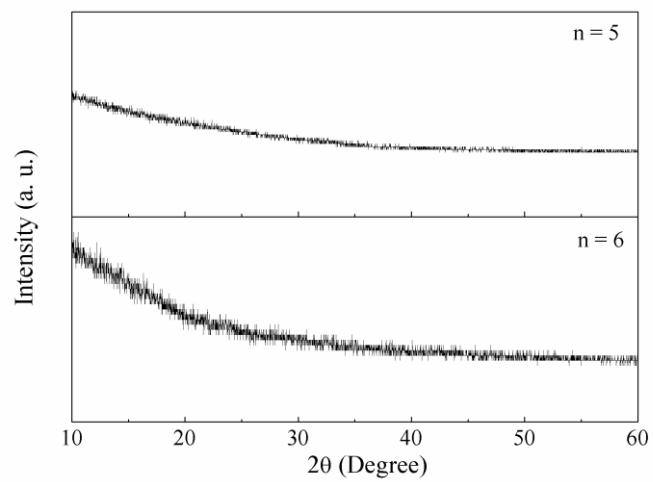

Figure S4. Powder XRD patterns of the as-prepared  $\text{Li}_3\text{AlH}_6 - n \text{ AB}$  ( $n = 5$  and  $6$ ) composites after heating to  $250\text{ }^\circ\text{C}$

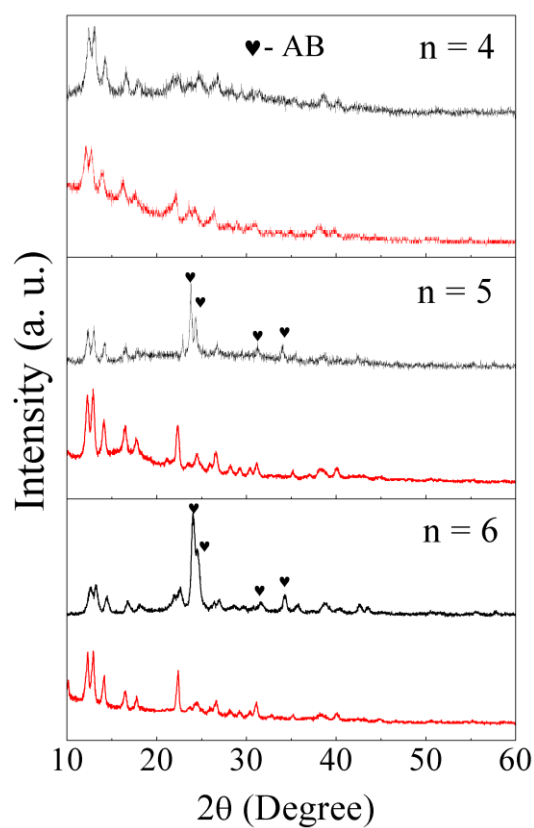

Figure S5. Powder XRD patterns for the as-prepared  $\text{Li}_3\text{AlH}_6 - n \text{ AB}$  ( $n = 4, 5,$  and  $6$ ) composites (black lines) and the related products cooled down to room temperature after heating to  $90^\circ\text{C}$  (red lines). For clarity, the intensity of the post-heated products was magnified 2, 2.5, and 3.5 times for  $n = 4, 5,$  and  $6,$  respectively.

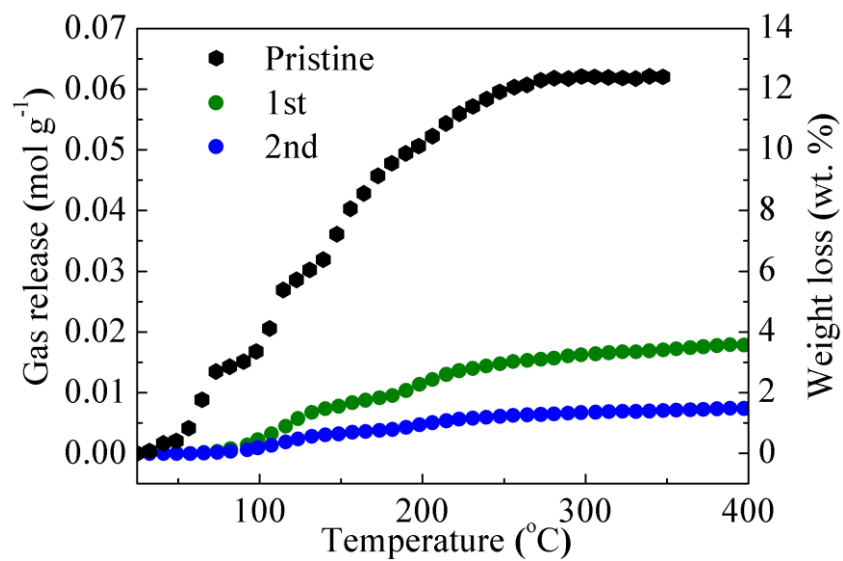

Figure S6. TPD results for the decomposition of the products after 1<sup>st</sup> and 2<sup>nd</sup> hydrogenation of the spent fuels from the post-milled  $\text{Li}_3\text{AlH}_6 - 6\text{AB}$ , including pristine  $\text{Li}_3\text{AlH}_6 - 6\text{AB}$  for comparison.

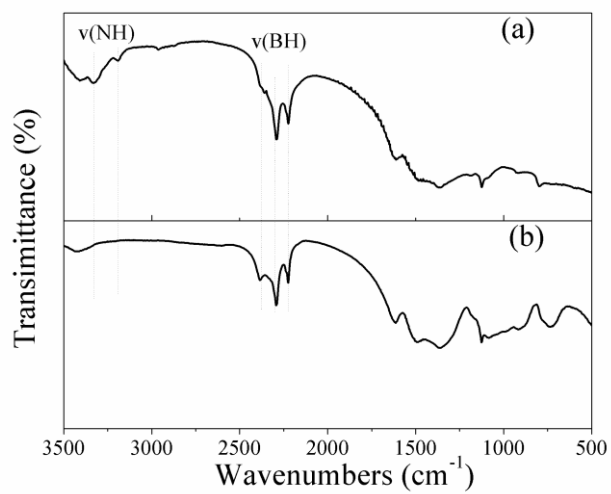

Figure S7. FTIR spectra of the regenerated  $\text{Li}_3\text{AlH}_6 - 4\text{AB}$  (a) and the dehydrogenated products after heating to 250 °C (b).
